# Supplementary material
Source: publisher site journal article supplement (https://www.spandidos-publications.com/8473/downloadSupplementary)

Figure S1. Treatment with  $\text{InCl}_3$  led to aberrant mitotic spindles. Immunofluorescence staining of control and  $\text{InCl}_3$ -treated TM3 (A) and MA-10 (B) cells with antibodies against  $\gamma$ -tubulin (centrosome) and  $\alpha$ -tubulin (mitotic spindles). DNA was stained with DAPI. Scale bars,  $20\ \mu\text{m}$ . The mitotic spindles are indicated by white arrows.  $\text{InCl}_3$ , indium chloride.

A

TM3 cells

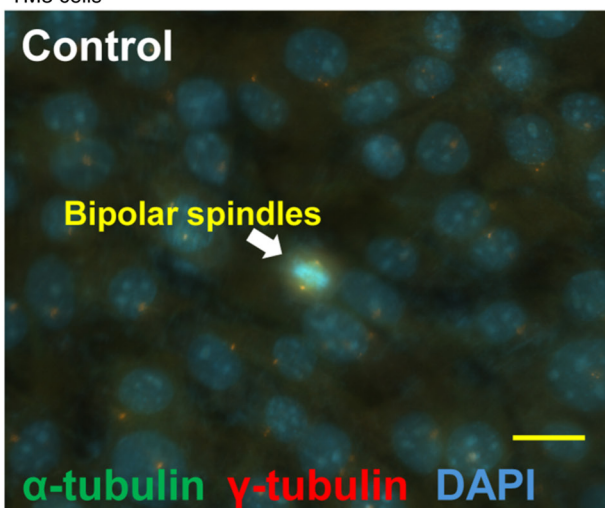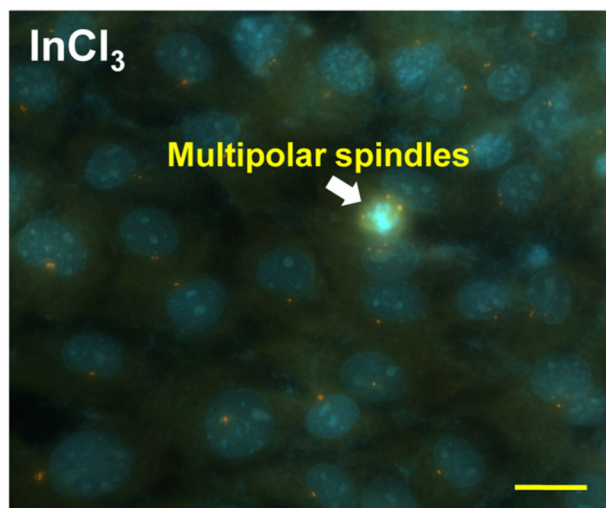

B

MA-10 cells

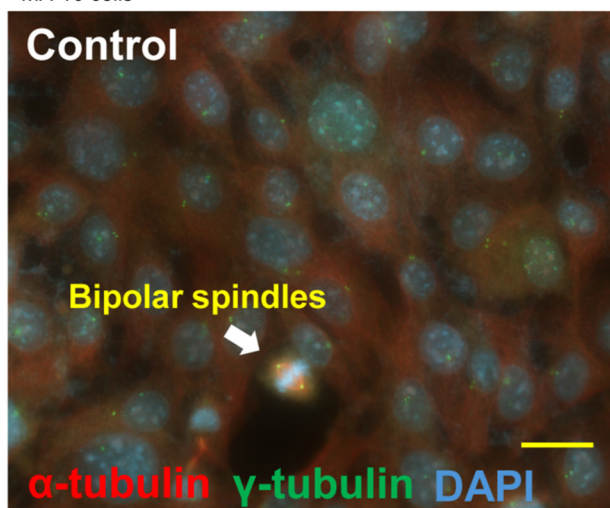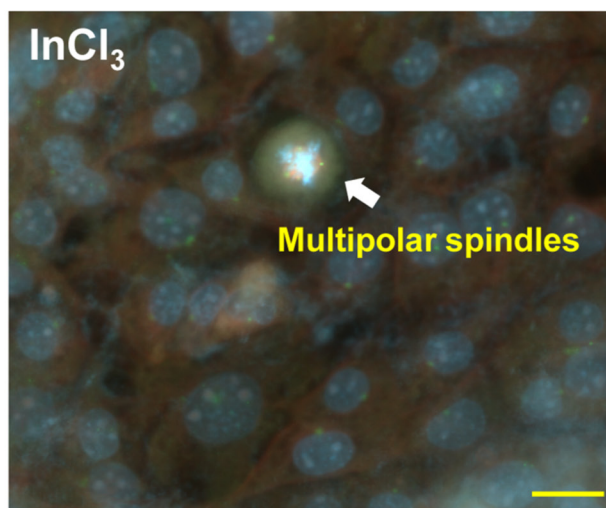

Figure S2. Treatment with  $\text{InCl}_3$  leads to centrosome amplification. Immunofluorescence staining of Control and  $\text{InCl}_3$ -treated TM3 (A) and MA-10 (B) cells with antibodies against  $\gamma$ -tubulin (centrosome). DNA was stained with DAPI. Scale bars,  $20 \mu\text{m}$ . The centrosome amplification is indicated by white arrows.  $\text{InCl}_3$ , indium chloride.

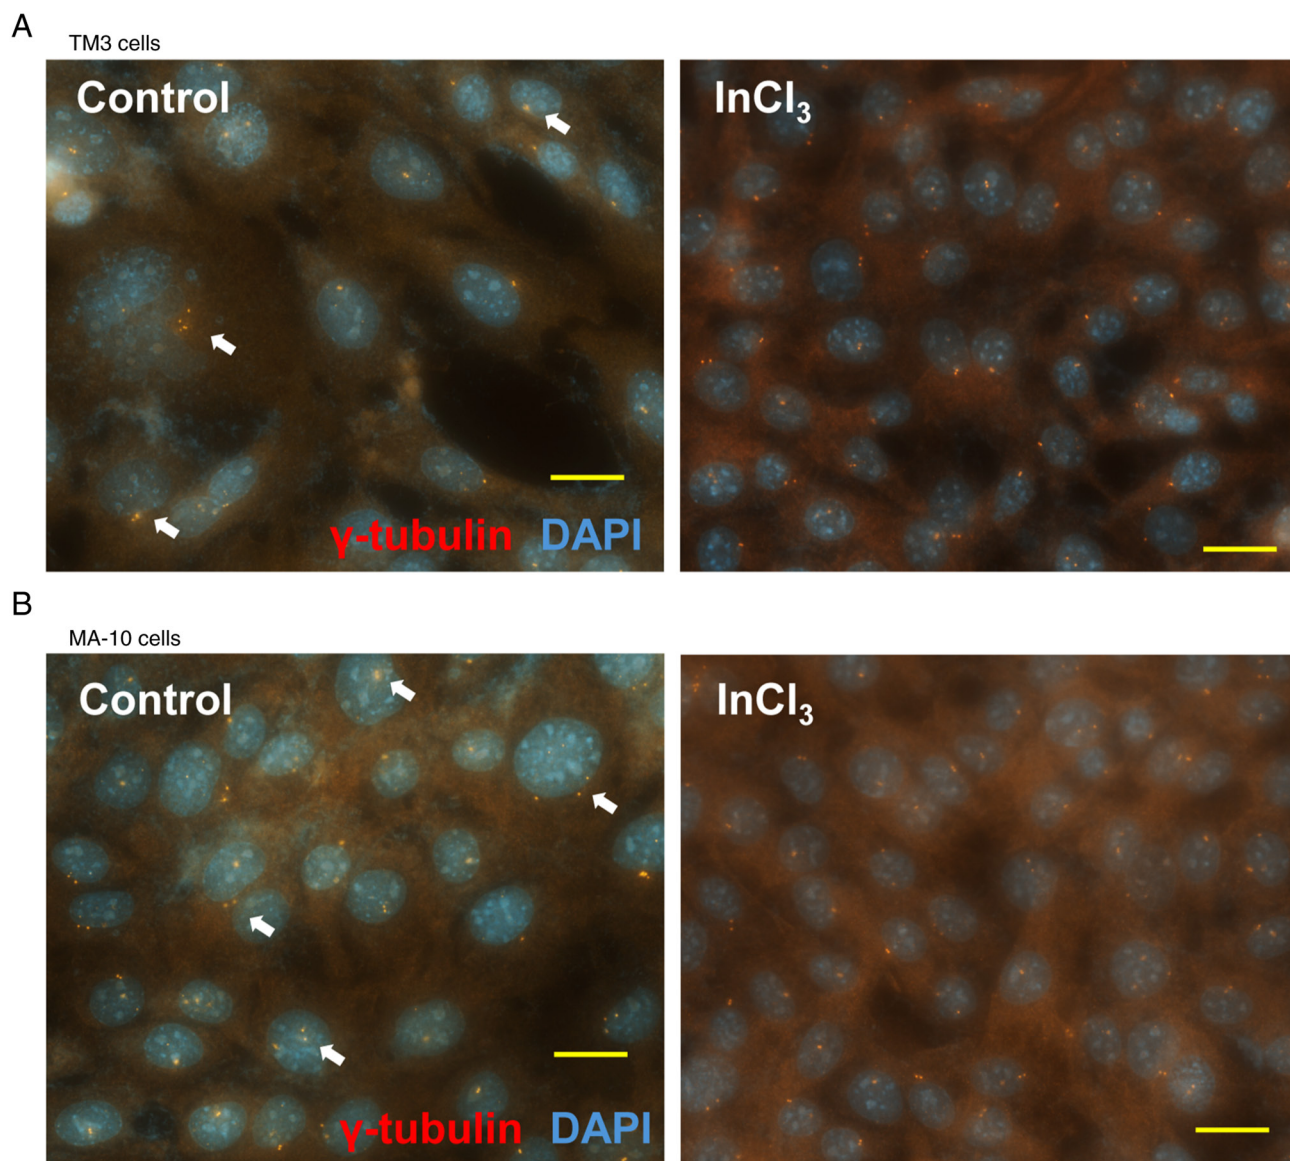

Figure S3. Treatment with NAC alleviates  $\text{InCl}_3$ -induced centrosome amplification. Representative immunofluorescence images of cells subjected to the indicated treatments, stained with an antibody against  $\gamma$ -tubulin. DNA was counterstained with DAPI. Scale bars, 20  $\mu\text{m}$ . The centrosome amplification is indicated by white arrows.  $\text{InCl}_3$ , indium chloride.

TM3 cells

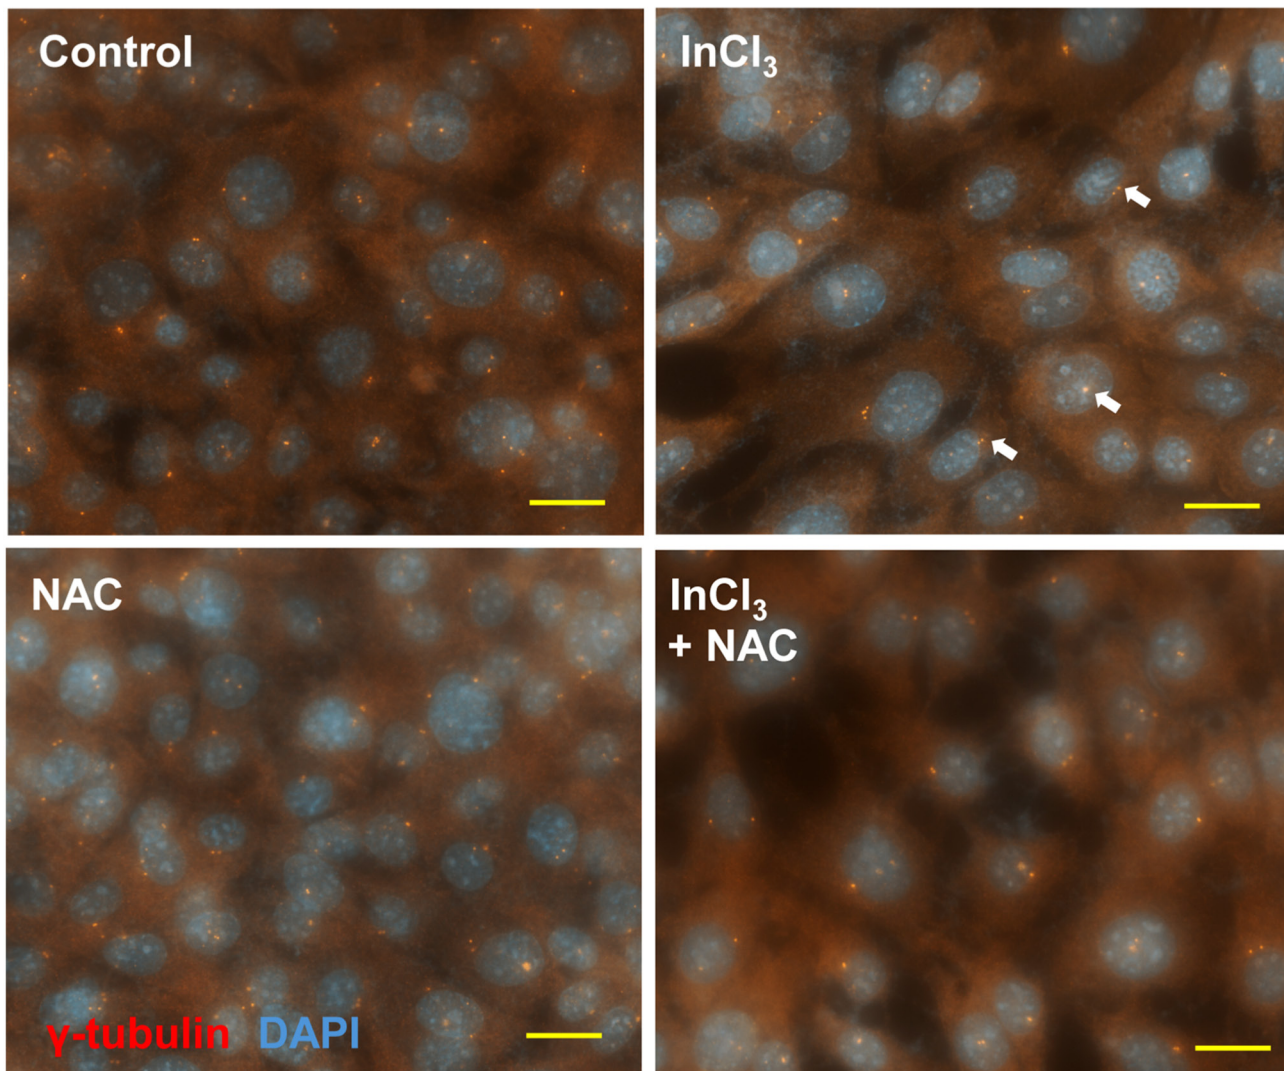

Figure S4. Inhibition of ROS alleviates  $\text{InCl}_3$ -induced centrosome amplification. Representative immunofluorescence images of cells subjected to the ROS inhibitors (A) Mito or (B) DPI under  $\text{InCl}_3$  treatment, stained with an antibody against  $\gamma$ -tubulin. DNA was counterstained with DAPI. Scale bars, 20  $\mu\text{m}$ . The centrosome amplification is indicated by white arrows. ROS, reactive oxygen species;  $\text{InCl}_3$ , indium chloride; DPI, diphenyleneiodonium.

A

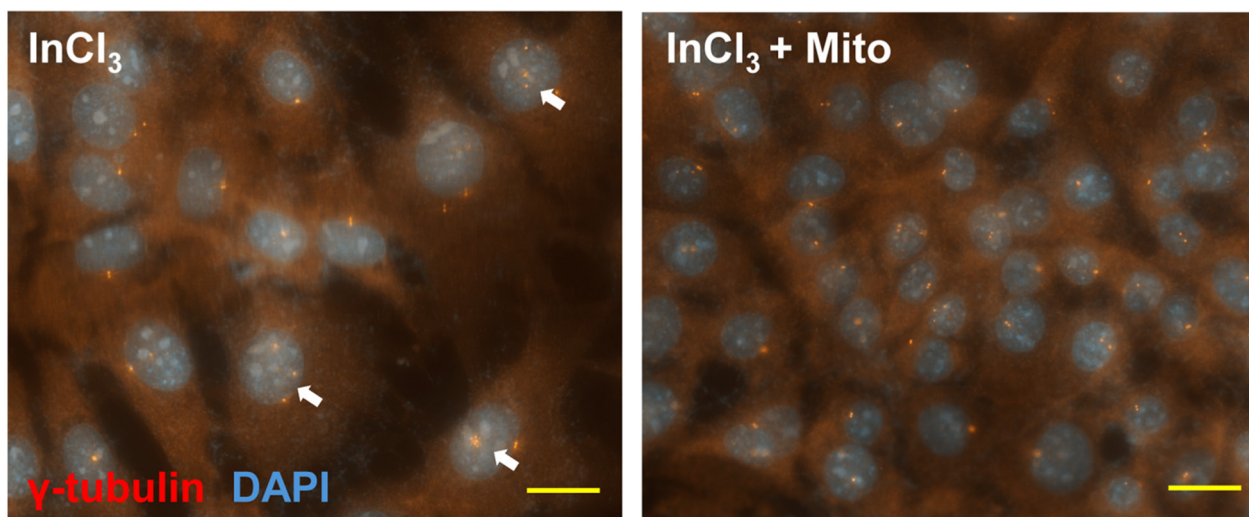

B

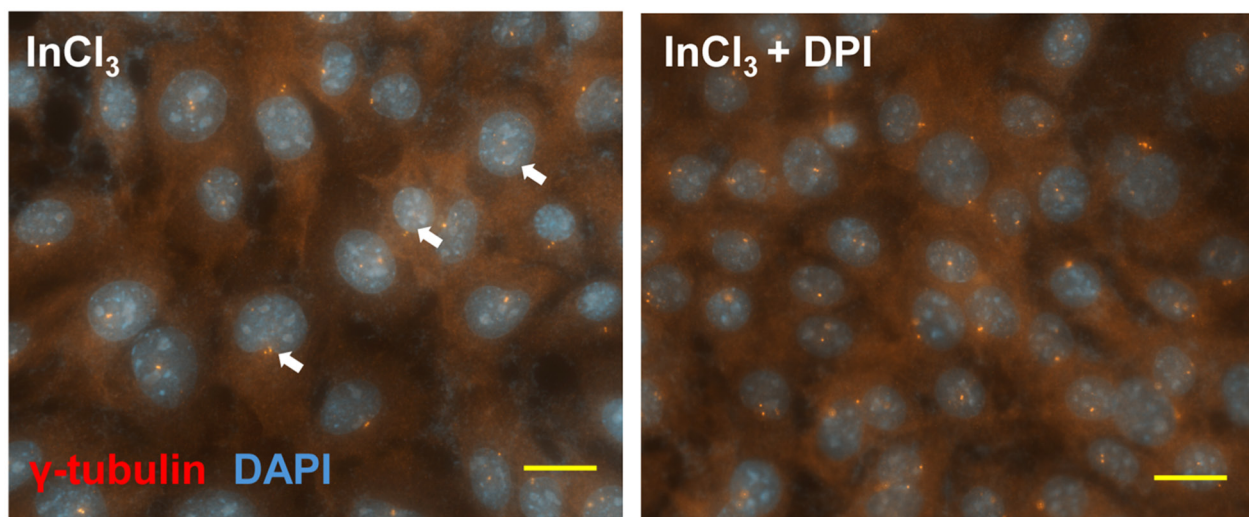

Figure S5. DNA-PK induces centrosome amplification upon  $\text{InCl}_3$  treatment. Representative immunofluorescence images of cells subjected to (A) vanillin (DNA-PK inhibitor) or (B) siPKcs in the presence of  $\text{InCl}_3$ , stained with an antibody against  $\gamma$ -tubulin. DNA was counterstained with DAPI. Scale bars, 20  $\mu\text{m}$ . The centrosome amplification is indicated by white arrows. DNA-PK, DNA-dependent protein kinase;  $\text{InCl}_3$ , indium chloride; siPKcs, small interfering RNA against DNA-PKcs.

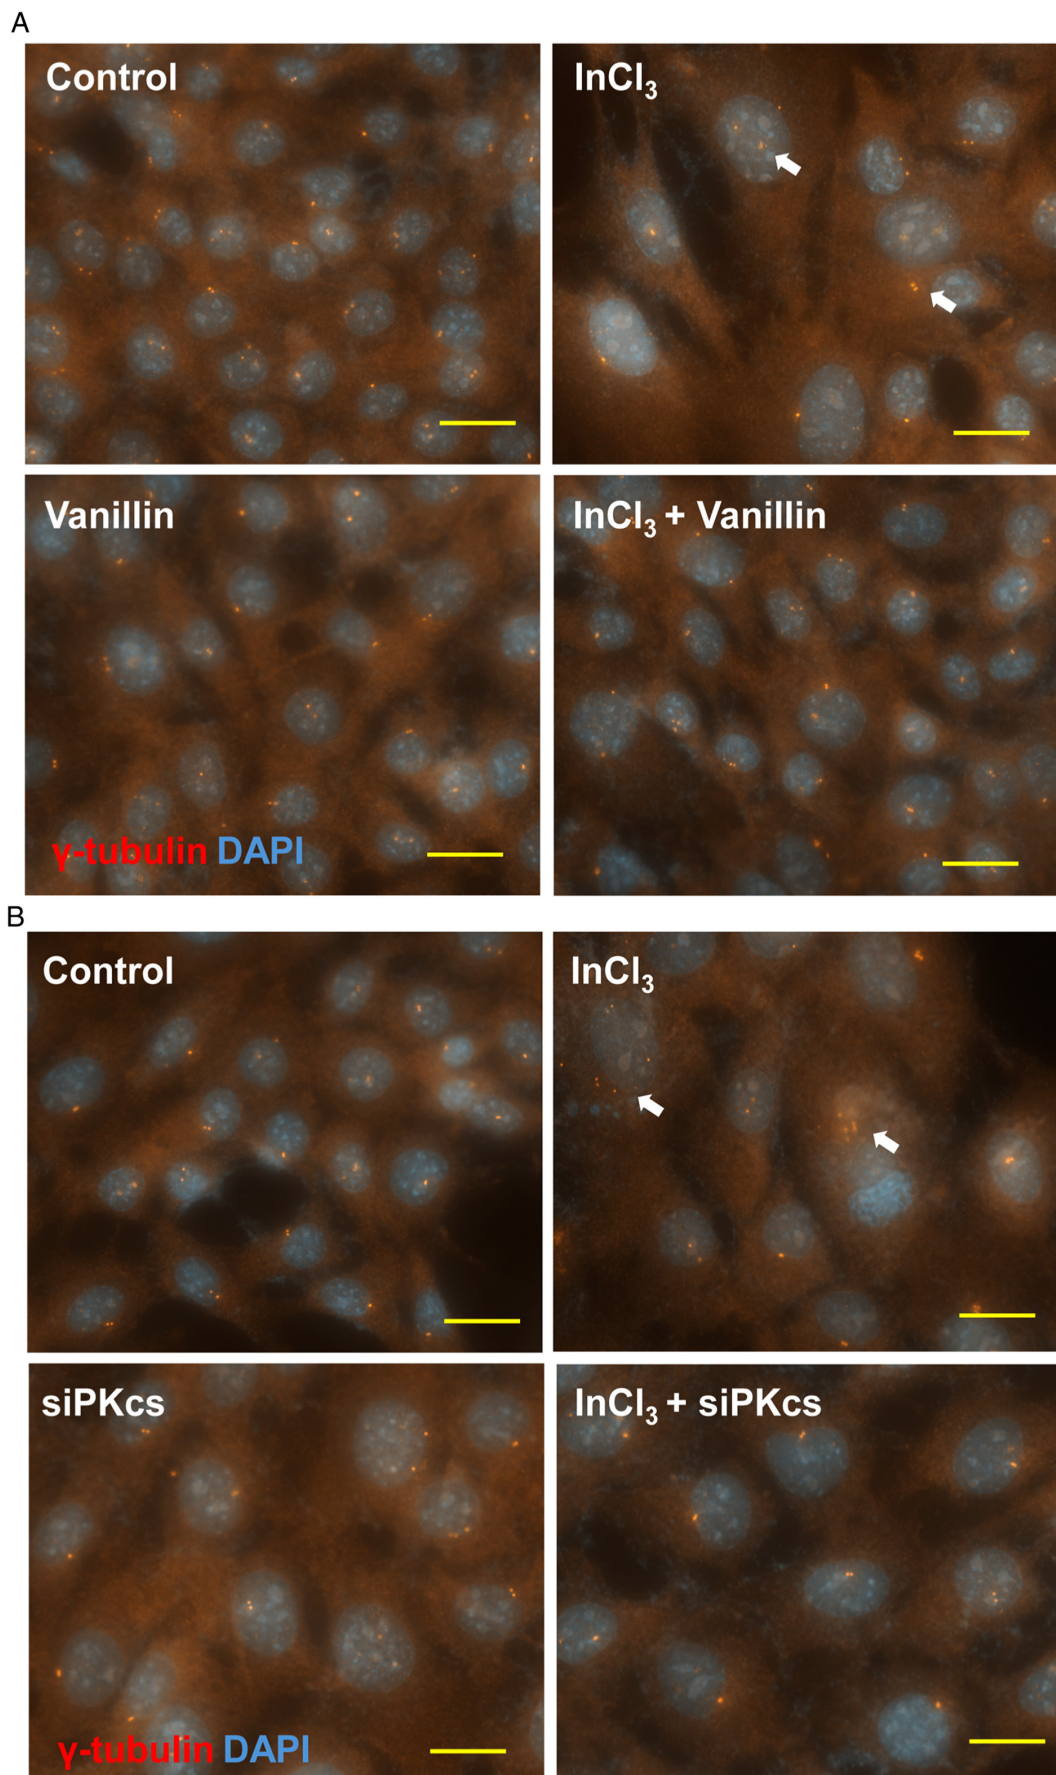

Figure S6. Autophagy induces centrosome amplification upon  $\text{InCl}_3$  treatment. Representative immunofluorescence images of cells subjected to (A) CQ or (B) siATG7 in the presence of  $\text{InCl}_3$ , stained with an antibody against  $\gamma$ -tubulin. DNA was counterstained with DAPI. Scale bars,  $20\ \mu\text{m}$ . The centrosome amplification is indicated by white arrows. CQ, chloroquine; ATG7, autophagy related 7;  $\text{InCl}_3$ , indium chloride; siATG7, small interfering RNA against ATG7.

A

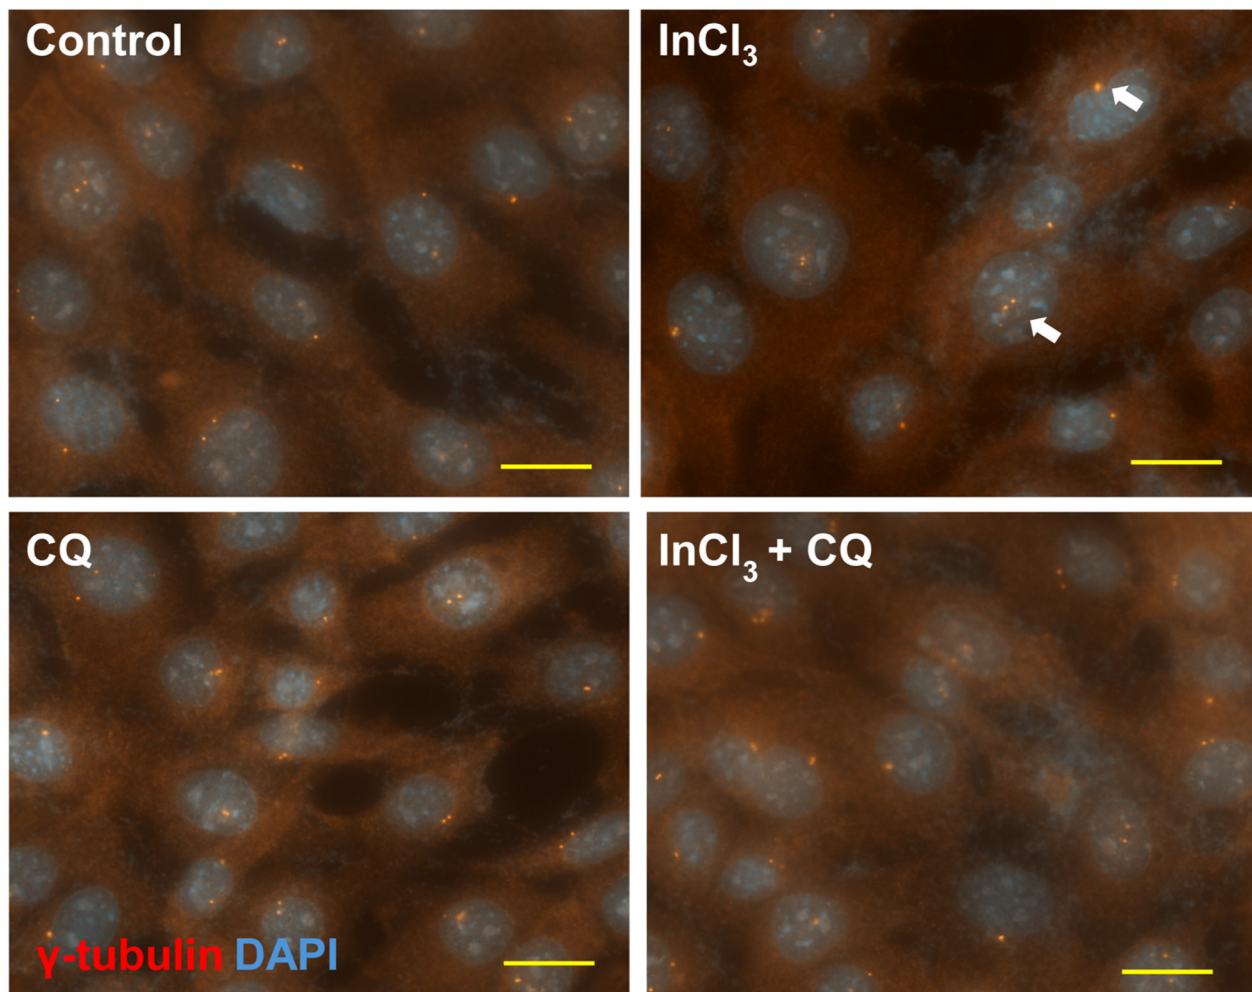

B

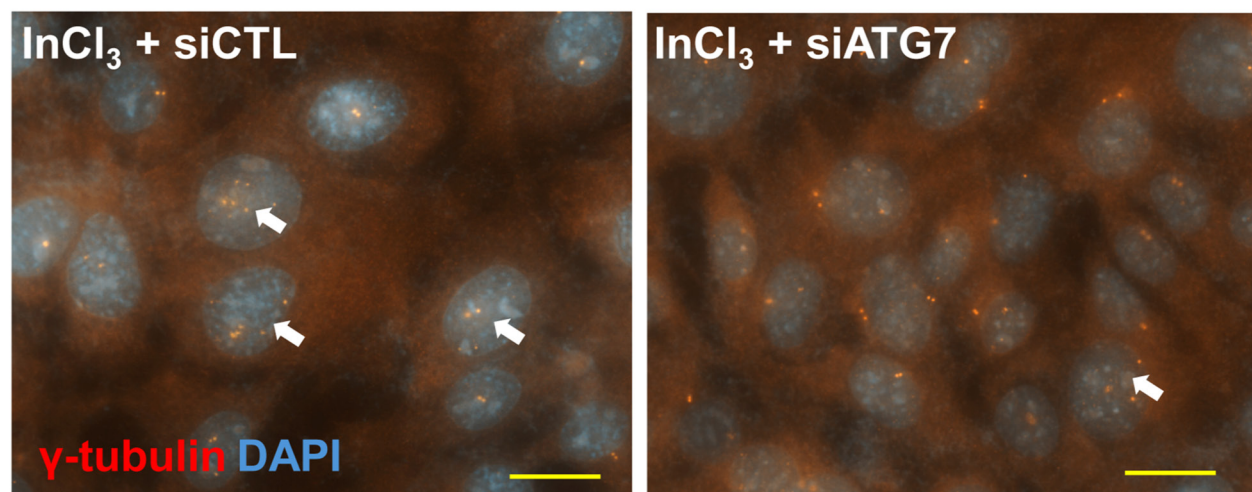

Supplement: Supplementary file 1 [file downloadSupplementary]
